# Supplementary material for: DNA Metabarcoding Methods for the Study of Marine Benthic Meiofauna: A Review
Source: Frontiers journal article supplement (doi:10.3389/fmars.2021.730063), 2021-09-30
Supplement: Data_Sheet_2.xlsx [file Data_Sheet_2.xlsx]

## Sheet: Sheet1
Supplementary Data Sheet 2: Metadata for analysis.
Reference	Geographical location	Sediment location	Replicates per site	Amount of sediment sampled	Sampling instrument	Sampling depth (cm)	Number of slices processed	Sample type for DNA extraction	Meiofaunal isolation method	Smallest sieve size (µm)	Sample conservation method prior to DNA extraction	Amount of sediment for DNA extraction	Number of extraction replicates	Implementation of negative controls	DNA extraction method	Primer pairs	Marker gene region	Marker gene	Number of PCR replicates	Implementatin of controls for PCR	Sequencing platform	Number of raw total reads	Number of quality filtered total reads	Bioinformatic unit	Bioinformatic processing	Reference database	Notes
Atherton & Jondelius, 2020	Sweden	Subtidal	2-3	500 mL	Not reported	Not reported	Whole	Extracted	Sieve + decantation with MgCl2	125	95% ethanol	Not reported	Not reported	Not reported	QIAGEN DNeasy / MoBio PowerSoil DNA Isolation Kit	SSU_F04 + SSU_R22 MCO_F224 + MCO_R551	18S V1-V2 COI	18S COI	Not reported	Not reported	Illumina MiSeq	41410434 (18S) 20484405 (COI)	9691423 (18S) 9043200 (COI)	OTU	DADA2	SILVA NCBI nucleotide database
Atienza et al., 2020	Western Mediterranean Sea, NE Iberian Peninsula	Deep	3	10.2 - 30.5 mL	Multicorer	5	3	Sediment			Absolute ethanol	10 g	Not reported	Not reported	QIAGEN DNeasy / MoBio PowerMax Soil DNA Isolation Kit	mlCOIintF-XT + jgHCO2198	COI	COI	1	Negative	Illumina MiSeq	15497229	2068065	MOTU	SWARM v2	EMBL BOLD
Bellisario et al., 2021	Spain, Portugal	Estuary	3	Not reported	Falcon tube	5	Whole	Sediment			Frozen	10 g	Not reported	Negative	QIAGEN DNeasy / MoBio PowerMax Soil DNA Isolation Kit	TAReuk454FWD1 + TAReukREV3 mlCOIintF + LoboR1	18S V4 COI	18S COI	2	Negative	Illumina MiSeq	1101851 (18S) 1765470 (COI)	463167 (18S) 611639 (COI)	OTU	97% threshold	GenBank
Bernardino et al., 2019	Brazil	Estuary	2	300 g wet weight	Not reported	5	Whole	Extracted	Sieve + decantation with (artificial) seawater	45	Frozen	Meiofauna from 200 g wet weight	1	Not reported	QIAGEN DNeasy / MoBio PowerSoil DNA Isolation Kit	Euk_1391f + EukBr	18S V9	18S	2	Not reported	Illumina MiSeq	9836039	6840886	OTU	Clustered ASVs	SILVA
Bik et al., 2012a	USA	Subtidal	Not reported	Not reported	Not reported	Not reported	Whole	Extracted	Sieve + decantation with (artificial) seawater	45	Frozen	200 µL	Not reported	Not reported	Bead beating: Zymo Research Disruptor Genie	SSU_F04 + SSU_R22 NF1 + 18Sr2b	18S V1-V2 18S V7	18S	Not reported	Not reported	GS FLX Titanium platform		939806	OTU	95-99% threshold	GenBank SILVA
Bik et al., 2012b	Pacific and Atlantic	Deep + Intertidal + Subtidal	1		Multicorer Corer	5	Whole	Extracted	Sieve + Ludox protocol	45	Frozen	200 μL	Not reported	Not reported	Bead beating: Zymo Research Disruptor Genie	SSU_F04 + SSU_R22 NF1 + 18Sr2b	18S V1-V2 18S V7	18S	Not reported	Not reported	GS FLX Titanium platform	1316988	969343	OCTU	95% threshold 99% threshold	GenBank
Brandt et al., 2020	Western Mediterranean, Gibraltar Strait, North Atlantic, Arctic	Deep	3	Not reported	Multicorer	1	Whole	Sediment			Frozen	10 g 3-5 g	Not reported	Field Mock sample	QIAGEN DNeasy / MoBio PowerMax Soil DNA Isolation Kit QIAGEN RNeasy PowerSoil Total RNA Kit + DNA Extraction Kit	SSU_F04 + SSU_R22mod TAReuk454FWD1 + TAReukREV3 mlCOIintF + jgHCO2198	18S V1-V2 18S V4 COI	18S COI	3	Not reported	Illumina HiSeq	± 70000000 (18S V1-V2) ± 30000000 (18S V4) ± 61000000 (COI)	± 44000000 (18S V1-V2) ± 16000000 (18S V4) ± 45000000 (COI)	ASV OTU	DADA2 Clustered ASVs	SILVA MIDORI
Brandt et al., 2021a	Mediterranean	Deep	3	Not reported	Corer	1	Whole	Extracted Sediment	Sieve	500 250 40 20	Frozen	1-10 g 2-5 g	Not reported	Negative	QIAGEN DNeasy / MoBio PowerMax Soil DNA Isolation Kit	SSU_F04 + SSU_R22mod TAReuk454FWD1 + TAReukREV3 mlCOIintF + jgHCO2198	18S V1-V2 18S V4 COI	18S COI	3	Negative	Illumina HiSeq	± 19000000 (18S V1-V2) ± 14000000 (18S V4) ± 26000000 (COI)	± 12000000 (18S V1-V2) ± 11000000 (18S V4) ± 20000000 (COI)	OTU	Clustered ASVs	SILVA PR2 MIDORI-UNIQUE
Brandt et al., 2021b	Mediterranean, Arctic, North Atlantic, Gibraltar Strait	Deep	3	Not reported	Multicorer	1	Whole	Sediment	Sediment sample		Frozen	10 g	Not reported	Field Negative	QIAGEN DNeasy / MoBio PowerMax Soil DNA Isolation Kit	SSU_F04 + SSU_R22mod mlCOIintF + jgHCO2198	18S V1-V2 COI	18S COI	3	Negative	Illumina HiSeq	± 44000000 (18S) ± 33000000 (COI)	± 8200000 (18S) ± 4800000 (COI)	OTU ASV	Clustered ASVs DADA2	SILVA MIDORI-UNIQUE
Brannock & Halanych, 2015	USA	Subtidal	2	Not reported	Metal trowel	3	Whole	Sediment Extracted	Sieve + decantation with (artificial) seawater	45	Frozen	0.3 g 5 g 10 g 200 g 400 g	2	Not reported	QIAGEN DNeasy / MoBio PowerSoil DNA Isolation Kit QIAGEN DNeasy / MoBio PowerMax Soil DNA Isolation Kit	1380F + 1510R	18S V9	18S	2	Not reported	Illumina HiSeq	2554892	1870369-2285218	OTU	97% threshold	SILVA
Brannock et al., 2018	Antarctica	Deep	2	157.1 mL	Megacorer Box corer	2	Whole	Extracted	Sieve + decantation with (artificial) seawater	45	Frozen	500 µL meiofauna isolate	Not reported	Not reported	QIAGEN DNeasy / MoBio PowerSoil DNA Isolation Kit	1380F + 1510R	18S V9	18S	2	Not reported	Illumina MiSeq Illumina HiSeq	21991788	15785074	OTU	97% threshold	SILVA
Brannock et al., 2014	United States	Intertidal	3	125.7 mL	PVC pipe	10	2	Extracted	Sieve + decantation with (artificial) seawater	45	Frozen	1 mL meiofauna isolate	Not reported	Not reported	QIAGEN DNeasy / MoBio PowerSoil DNA Isolation Kit	1380F + 1510R	18S V9	18S	2	Not reported	Illumina MiSeq Illumina HiSeq	24381423	21970895	OTU	97% threshold	SILVA
Brannock et al., 2016	United States	Subtidal	1-2	Some samples 1500 mL. others not reported	Box corer Multicorer	3	Whole	Sediment			Frozen	10.5 g	1	Not reported	QIAGEN DNeasy / MoBio PowerMax Soil DNA Isolation Kit	1380F + 1510R	18S V9	18S	2	Not reported	Illumina MiSeq Illumina HiSeq	18757974	13156522	OTU	97% threshold	SILVA
Broman et al., 2019	Sweden	Subtidal	1	100 mL	Corer	2	Whole	Extracted	Sieve + decantation with Levasil	40	Frozen	10 mL meiofauna isolate	Not reported	Not reported	QIAGEN DNeasy / MoBio PowerMax Soil DNA Isolation Kit	TAReuk454FWD1 + TAReukREV3	18S V4	18S	3	Not reported	Illumina MiSeq	18400000	9200000	ASV	DADA2	NCBI nucleotide database SILVA
Castro et al., 2021	Colombia	Intertidal	3	100.1 mL	Corer	10	Whole	Extracted Sediment	Sieve + decantation with MgCl2 Sieve + Ludox protocol	45	Absolute ethanol, freezer	Not reported	Not reported	Negative	QIAGEN DNeasy / MoBio PowerSoil DNA Isolation Kit	SSU_F04 + SSU_R22 mlCOIintF + LoboR1	18S V1-V2 COI	18 S COI	3	Negative	Illumina NextSeq	2164008 (18S V1-V2) 2238690 (COI)	711237 (18S V1-V2) 414053 (COI)	ASV	DADA2	custom CRUX reference databases
Chariton et al., 2010	Australia	Estuary	4	157.1 mL	Corer	2	Whole	Extracted	Sieve	63	Not reported	Not reported	Not reported	Not reported	MoBio UltraCleanSoil DNA Extraction Kit	All18SF + All18SR	18S V9	18S	Not reported	Not reported	454 pyrosequencing	Not reported	Over 316600	OTU	Not reported	GenBank
Chariton et al., 2014	United States	Estuary	N.A.	2.7 L	Corer	15	Whole	Sediment			Aerated, flow-through, filtered seawater system	0.25 g	Not reported	Positive	QIAGEN DNeasy / MoBio PowerSoil DNA Isolation Kit	SSU_F04 + SSU_R22	18S V1-V2	18S	Not reported	Not reported	454 pyrosequencing	Over 1037000	± 970000	OTU	96% threshold	GenBank
Chariton et al., 2015	Australia	Estuary	5	Not reported	van Veen grab	2	Whole	Sediment			Frozen	1.5 g	Not reported	Mock sample	MoBio UltraCleanSoil DNA Extraction Kit	All18SF + All18SR	18S V9	18S	Not reported	Not reported	454 pyrosequencing	± 1300000		MOTU	APDP	SILVA
Clark et al., 2020	New Zealand	Estuary	5	2.65 mL	Vial	1.5	Whole	Sediment			Frozen	2 g	Not reported	Field	QIAGEN DNeasy / MoBio PowerSoil DNA Isolation Kit	Uni18SF + Uni18SR	18S V4	18S	Not reported	Negative	Illumina MiSeq	Not reported		ASV	DADA2	PR2
Cordier et al., 2019	Italy	Subtidal	3	10 g	Box corer, subsampled with spoon	Surface sediment	Whole	Sediment			Frozen	500 µL	3	Negative	QIAGEN DNeasy / MoBio PowerSoil DNA Isolation Kit	SSU_F04mod + SSU_R22mod TAReuk454FWD1 + TAReukREV3 mlCOIintF + dgHCO2198	18S V1-V2 18S V4 COI	18S COI	1	Negative	Illumina MiSeq	100409268	33268657	OTU	SWARM v2	SILVA MIDORI
Cowart et al., 2015	France	Subtidal	2-3	1178.1 mL	Corer	15	Whole	Extracted	Sieve	500	Frozen	10 g meiofauna isolate	Not reported	Not reported	QIAGEN DNeasy / MoBio PowerSoil DNA Isolation Kit	SSU_F04 + SSU_R22 dgLCO1490 + dgHCO2198 LCO1490 + HCO2198	18S V1-V2 COI	18S COI	2	Not reported	454 pyrosequencing	190509 (18S) 622468 (COI)	150677 (18S) 411086 (COI)	MOTU	97% threshold	GenBank SILVA EMBL
Creer et al., 2010	England	Intertidal	3	152.1 mL	Corer	10	Whole	Extracted	Sieve + Ludox protocol	45	DESS, room temperature	Not reported	Not reported	Not reported	QIAGEN QIAamp DNA Blood Maxi Kit	SSU_F04 + SSU_R22	18S V1-V2	18S	Not reported	Negative	454 pyrosequencing	Not reported	29756	OCTU	95-99% threshold	NCBI nucleotide database
Dafforn et al., 2014	Australia	Estuary	3	Not reported	van Veen grab, subsampled with Falcon tube	1	Whole	Sediment			Frozen	8 g	Not reported	Mock sample	QIAGEN DNeasy / MoBio PowerMax Soil DNA Isolation Kit	All18SF + All18SR	18S V9	18S	Not reported	Not reported	454 pyrosequencing	Not reported	1080222	OTU	97% threshold	SILVA
Degenhardt et al., 2021	Germany	Estuary	5	Not reported	Plastic container	10	Whole	Extracted	Sieve + centrifugation with Kaolin and Levasil	32	Ethanol, DESS, 4 ℃	Not reported	Not reported	Not reported	Omega Bio-tek E.Z.N.A. Mollusc DNA kit	SSU_F04 + SSU_R22	18S V1-V2	18S	Not reported	Not reported	Illumina MiSeq	3537703	3408572	ASV	DADA2	NCBI nucleotide database Self-constructed
DiBattista et al., 2019	Japan	Subtidal	4	10 g	Falcon tube	5	Whole	Sediment			Frozen	0.5 - 0.8 g	Not reported	Negative	QIAGEN DNeasy / MoBio PowerSoil DNA Isolation Kit	18S_uni_1F + 18S_uni_400R	18S V1-V3	18S	2	Extraction negatives	Illumina MiSeq	3787288	Not reported	OTU	99% threshold	NCBI nucleotide database
Fais et al., 2020a	Portugal	Estuary	3	35.3 mL	Falcon tube	5	Whole	Sediment			Not reported	10 g	Not reported	Negative	QIAGEN DNeasy / MoBio PowerMax Soil DNA Isolation Kit	TAReuk454FWD1 + TAReukREV3 mlCOIintF + LoboR1	18S V4 COI	18S COI	Not reported	Extraction negatives	Illumina MiSeq	871585 (18S V4) 943334 (COI)	40574 (18S V4) 368472 (COI)	OTU	97% threshold	GenBank
Fais et al., 2020b	Portugal	Estuary	3	35.3 mL	Falcon tube	5	Whole	Sediment			Frozen	10 g	Not reported	Not reported	QIAGEN DNeasy / MoBio PowerMax Soil DNA Isolation Kit	TAReuk454FWD1 + TAReukREV3 mlCOIintF + LoboR1	18S V4 COI	18S COI	Not reported	Negative	Illumina MiSeq	864663 (18S V4) 838863 (COI)	393377 (18S V4) 378952 (COI)	OTU	97% threshold	GenBank
Faria et al., 2018	Brazil	Intertidal	4	49.1 mL	Corer	10	Whole	Extracted	Sieve + Ludox protocol	63	Absolute ethanol, freezer	0.25 g meiofauna isolate	Not reported	Not reported	QIAGEN DNeasy / MoBio PowerSoil DNA Isolation Kit	SSU_F04 + SSU_R22	18S V1-V2	18S	Not reported	Not reported	Illumina MiSeq	8040154	Not reported	OTU	80% threshold	GenBank
Fegley et al., 2020	USA	Intertidal	3	Not reported	Not reported	Not reported	Whole	Extracted	Sieve + decantation with (artificial) seawater	32	Frozen	150 mL	Not reported	Not reported	QIAGEN DNeasy Blood and Tissue Kit		18S V4	18S	Not reported	Not reported	Illumina MiSeq	Not reported	± 5100000	OTU	97% threshold	SILVA	Excluded from primer analysis. Primers are not clearly mentioned in the study because labwork and sequencing is performed by an external company
Fonseca et al., 2014	UK, France, Spain, Portugal, Gambia	Intertidal	3	152.1 mL	Corer	10	Whole	Extracted	Sieve + Ludox protocol	45	DESS	Meiofauna isolate from 152 mL	Not reported	Not reported	QIAGEN QIAamp DNA Blood Maxi Kit	SSU_F04 + SSU_R22	18S V1-V2	18S	3	Negative	454 pyrosequencing	877423	694802	OTU	96% threshold	GenBank EMBL DDBJ
Fonseca et al., 2010	England	Intertidal	3	152.1 mL	Corer	10	Whole	Extracted	Sieve + Ludox protocol	45	DESS	Meiofauna isolate from 152 mL	Not reported	Not reported	QIAGEN QIAamp DNA Blood Maxi Kit	SSU_F04 + SSU_R22	18S V1-V2	18S	3	Negative	454 pyrosequencing	353896	305702	OCTU	96% threshold	GenBank EMBL DDBJ
Fonseca et al., 2017	Antarctica	Subtidal	3	Not reported	Corer	Not reported	Whole	Extracted	Sieve + Ludox protocol	45	DESS	Not reported	Not reported	Not reported	QIAGEN QIAamp DNA Blood Maxi Kit	SSU_F04 + SSU_R22	18S V1-V2	18S	3	Negative	454 pyrosequencing	61057	49655	OTU	97% threshold	SILVA
Guardiola et al., 2015	Western Mediterranean	Deep	2-3	50.9 mL	Multicorer Box corer	5	3 Whole	Extracellular	Extracellular DNA		Ethanol DESS	9 g	Not reported	Not reported	QIAGEN DNeasy Blood and Tissue Kit	18S_allshorts	18S V7	18S	3	Negative	Illumina MiSeq	3840493	2720318	OTU	96% threshold	EMBL
Guardiola et al., 2016	Western Mediterranean	Deep	3	50.9 mL	Multicorer	5	3	Sediment			Absolute ethanol	10 g 2 g	Not reported	Not reported	QIAGEN DNeasy / MoBio PowerMax Soil DNA Isolation Kit QIAGEN RNeasy PowerSoil Total RNA Kit + DNA Extraction Kit	18S_allshorts	18S V7	18S	Not reported	Negative	Illumina MiSeq	Not reported	9691911	MOTU	CROP	EMBL
Haenel et al., 2017	Sweden	Subtidal	6-10	2.4 L 12 L 200 mL	Not reported	Not reported	Whole	Extracted	Sieve + siphoning Sieve + decantation with MgCl2 Sieve + decantation with freshwater	70 125 45	96% ethanol	10 g	Not reported	Not reported	QIAGEN DNeasy / MoBio PowerMax Soil DNA Isolation Kit	SSU_F04 + SSU_R22 mlCOIintF + dgHCO2198 mlCOIintF + LoboR1	18S V1-V2 COI	18S COI	3	Not reported	Illumina MiSeq	8249601 (18S V1-V2) 15883274 (COI)	890370 (18S V1-V2) 7954017 (COI)	OTU	CROP	BOLD SweBol self-constructed database SILVA GenBank
He et al., 2021	Canada	Subtidal	3	10.6 mL	van Veen grab, syringe	2	Whole	Sediment			Not reported	0.25 g	Not reported	Negative	QIAGEN DNeasy / MoBio PowerSoil DNA Isolation Kit	SSU_F04mod + SSU_R22mod*	18S V1-V2	18S	3	Negative	Illumina MiSeq	Not reported	42303843	OTU	Clustered ASVs	SILVA	Named and SSU_R22mod* here (SSU_R22mod in original study), to discriminate with SSU_R22mod by Sinniger et al. (2016).
He et al., 2020	Canada	Subtidal	3	10.6 mL	van Veen grab, syringe	2	Whole	Extracted Sediment	Sieve	45	95% ethanol	0.25 g meiofauna isolate	Not reported	Negative	QIAGEN DNeasy / MoBio PowerSoil DNA Isolation Kit	SSU_F04mod + SSU_R22mod*	18S V1-V2	18S	3	Negative	Illumina MiSeq	± 99130000	± 28960000	ASV	DADA2	SILVA	Named and SSU_R22mod* here (SSU_R22mod in original study), to discriminate with SSU_R22mod by Sinniger et al. (2016).
Holman et al., 2019	United Kingdom	Subtidal	9	10–20 g	Corer, spatula	2	Whole	Sediment			Frozen	10 g	1	Field Negative Positive	QIAGEN DNeasy / MoBio PowerMax Soil DNA Isolation Kit	Uni18SF + Uni18SR mlCOIintF + jgHCO2198	18S V4 COI	18S COI	Not reported	Negative	Illumina MiSeq	± 17800000	± 15200000	OTU	97% threshold	SILVA MIDORI
Kim et al., 2017	South Korea	Intertidal	3	3–5 kg	Shovel	5	Whole	Extracted	Sieve + Ludox protocol	63	On ice	Not reported	Not reported	Not reported	QIAGEN DNeasy / MoBio PowerSoil DNA Isolation Kit	D512 + D987	18S V4	18S	Not reported	Not reported	Illumina MiSeq	1854290	436154	OTU	97% threshold	SILVA
Kitahashi et al., 2020	Japan	Deep	1	43 mL	Multicorer	1	Whole	Sediment			Frozen	Not reported	Not reported	Not reported	QIAGEN DNeasy / MoBio PowerMax Soil DNA Isolation Kit	SSU_F04 + SSU_R22mod	18S V1-V2	18S	3	Negative	Illumina MiSeq	1588250	1263660	OTU	97% threshold	SILVA
Klunder et al., 2019	the Netherlands	Intertidal	9	4.5 L 50 mL	Corer	25 10	Whole	Extracellular Sediment	Extracellular DNA		5 °C Frozen	400 µl supernatant of 50 ml sediment aliquots 10 g	Not reported	Mock sample	QIAGEN DNeasy / MoBio PowerSoil DNA Isolation Kit QIAGEN DNeasy / MoBio PowerMax Soil DNA Isolation Kit	F566 + R1200	18S V4-V5	18S	3	Negative, positive	454 pyrosequencing	142118	104101	OTU	95% threshold	SILVA Local reference database
Klunder et al., 2020a	Mid Atlantic Ridge	Deep	1	50 mL	Box corer, subsampled with corer	10	Whole	Sediment			Frozen	10 g	Not reported	Mock sample	QIAGEN DNeasy / MoBio PowerMax Soil DNA Isolation Kit	SSU_F04 + SSU_R22mod	18S V1-V2	18S	2	Negative	Illumina MiSeq	Not reported	± 12300000	OTU	98% threshold	SILVA
Klunder et al., 2020b	the Netherlands	Subtidal	1	56 mL	Box corer, subsampled with corer	10	Whole	Sediment			Frozen	10 g	Not reported	Mock sample	QIAGEN DNeasy / MoBio PowerMax Soil DNA Isolation Kit	SSU_F04 + SSU_R22mod	18S V1-V2	18S	3	Negative	Illumina MiSeq	Not reported	± 6400000	OTU	95% threshold	SILVA
Lallias et al., 2015	United Kingdom	Estuary	3	152. 1	Perspex tube	10	Whole	Extracted	Sieve + Ludox protocol	45	DESS, frozen	3 mL of digested meiofauna solution	Not reported	Not reported	QIAGEN QIAamp DNA Blood Maxi Kit	SSU_F04 + SSU_R22	18S V1-V2	18S	3	Negative	454 pyrosequencing	957216	Not reported	OTU	96% threshold	SILVA NCBI nucleotide database
Lanzén et al., 2016	Norway	Subtidal	1	50 - 100 g	Not reported	Not reported	Whole	Sediment			96% ethanol, freezer	0.5 g	10	Not reported	QIAGEN DNeasy / MoBio PowerSoil DNA Isolation Kit	F566 + R1200	18S V4-V5	18S	8	Not reported	454 pyrosequencing	>1600000	Not reported	OTU	98% threshold	CREST (SilvaMod)
Lanzén et al., 2017	Norway	Subtidal	1	50 - 100 g	Not reported	Not reported	Whole	Sediment			96% ethanol, freezer	0.5 g	10	Not reported	QIAGEN DNeasy / MoBio PowerSoil DNA Isolation Kit	F566 + R1200	18S V4-V5	18S	8	Not reported	454 pyrosequencing	>500000	Not reported	OTU	98% threshold	CREST (SilvaMod)
Laroche et al., 2020	western Clarion Clipperton Zone (CCZ)	Deep	2-5	192.4 mL	Corer	5	Whole	Sediment			Frozen	10 g	Not reported	Negative	QIAGEN DNeasy / MoBio PowerMax Soil DNA Isolation Kit	Uni18SF + Uni18SR mlCOIintF + jgHCO2198	18S V4 COI	18S COI	2	Negative	Illumina MiSeq	10315003 (18S V4) 17202778 (COI)	Not reported	OTU ASV	Clustered ASVs DADA2	SILVA GenBank
Leasi et al., 2021	United States	Subtidal	3	Not reported	Ponar grab	2	Whole	Sediment			Frozen	Not reported	Not reported	Not reported	QIAGEN DNeasy / MoBio PowerMax Soil DNA Isolation Kit	18S-82F + Ek-516R	18S V3-V4	18S	Not reported	Not reported	Illumina MiSeq	Not reported	405140	ASV	DADA2	SILVA
Leasi et al., 2018	Panama	Intertidal + Subtidal	2	2-4 L	Jar or bucket	5	Whole	Extracted	Sieve + decantation with MgCl2	42	90% ethanol	10 mL meiofauna isolate	Not reported	Not reported	QIAGEN DNeasy / MoBio PowerSoil DNA Isolation Kit	Euk_1391f + EukBr	18S V9	18S	Not reported	Not reported	Illumina HiSeq	Not reported	120133	ASV OTU	DADA2 99% threshold	SILVA
Lejzerowicz et al., 2015	Scotland	Subtidal	5	Not reported	van Veen grab	2	Whole	Sediment			LifeGuard Preservation Solution (MoBio)	Not reported	Not reported	Not reported	MoBio PowerSoil RNA Isolation Kit with Mobio DNA Elution Accessory Kit	TAReuk454FWD1 + TAReukREV3	18S V4	18S	Not reported	Not reported	Illumina MiSeq	4500000	4102 (median number of reads per sample)	OTU	97% threshold	PR2
López-Escardó et al. , 2018	Europe	Subtidal	Varying number	61.6 mL	Corer	11	Whole	Sediment			Frozen	5 g	Not reported	Negative	NucleoSpin RNA L kit	TAReuk454FWD1 + TAReukREV3	18S V4	18S	3	Negative	454 pyrosequencing	1474466	3792934	OTU	97% threshold
Martínez et al., 2020	Italy	Intertidal + Subtidal	2	1 L	Jar	5	Whole	Extracted	Sieve + decantation with MgCl2	63	Ethanol, freezer	6 mL meiofauna isolate	Not reported	Not reported	QIAGEN DNeasy / MoBio PowerSoil DNA Isolation Kit	SSU_F04 + SSU_R22mod	18S V1-V2	18S	3	Negative	Illumina MiSeq	Not reported	± 460000	ZOTU	UNOISE	GenBank
Mauffrey et al., 2020	Denmark	Subtidal	3	9 g	Corer	10	Whole	Sediment			Frozen	10 g	1	Not reported	QIAGEN DNeasy / MoBio PowerMax Soil DNA Isolation Kit	SSU_F04 + SSU_R22 1380F + 1510R mlCOIintF + dgHCO2198	18S V1-V2 18S V9 COI	18S COI	3	Negative	Illumina MiSeq	8484022 (18S V1-V2) 12690199 (18S V9) 8247449 (COI)	7623747 (18S V1-V2) 12159889 (18S V9) 7669341 (COI)	OTU	SWARM v2	SILVA MIDORI
Nascimento et al., 2019	Tanzania	Intertidal	6	51 mL	Corer	3	Whole	Extracted	Sieve + decantation with Levasil	40	DESS, 4 °C	Not reported	Not reported	Not reported	QIAGEN DNeasy / MoBio PowerMax Soil DNA Isolation Kit	TAReuk454FWD1 + TAReukREV3	18S V4	18S	3	Not reported	Illumina MiSeq	10320000	6180945	OTU	96% threshold	SILVA
Nascimento et al., 2018	Sweden	Subtidal	5	30.4 mL	Corer	2	Whole	Sediment			Frozen	0.2 g 4 g 6 g 8 g 10 g	Not reported	Not reported	QIAGEN DNeasy / MoBio PowerMax Soil DNA Isolation Kit QIAGEN DNeasy / MoBio PowerSoil DNA Isolation Kit	TAReuk454FWD1 + TAReukREV3	18S V4	18S	3	Not reported	Illumina MiSeq	10320000	7776371	OTU	99% threshold 96% threshold	SILVA
Pansu et al., 2021	Australia	Estuary + Subtidal	5	500 mL	Plastic container	10	Whole	Sediment Extracellular			Frozen	1 g 10 g 200 g	Not reported	Negative	QIAGEN DNeasy / MoBio PowerMax Soil DNA Isolation Kit NucleoSpin Soil Kit	All18SF + All18SR mlCOIintF + jgHCO2198	18S V9 COI	18S COI	Not reported	Negative, positive	Illumina MiSeq	7813456 (18S V9) 3051786 (COI)	5672529 (18S V9) 1585648 (COI)	OTU	97% threshold	SILVA GenBank
Pawlowski et al., 2011	Arctic and Southern Oceans	Deep	1	Not reported	Multicorer	2	Whole	Sediment			Frozen	0.35 g 0.7 g	Not reported	Not reported	QIAGEN DNeasy / MoBio PowerSoil DNA Isolation Kit	1380F + 1510R	18S V9	18S	Not reported	Not reported	454 pyrosequencing	124671	29627	OTU	Needleman-Wunsch	Database by Guillou et al. (unpublished)
Pearman et al., 2016	Saudi Arabia	Intertidal + Subtidal	2	40 g	van Veen grab, hand-corer	10	Whole	Extracellular			Frozen	5 g	2	Not reported	Chloroform and Isoamyl Alcohol protocol	1380F + 1510R	18S V9	18S	2	Negative	Ion Torrent PGM sequencer	Not reported	9462296	OTU	97% threshold	SILVA
Pearman et al., 2020	New Zealand	Subtidal	3	40 g	van Veen grab	2	Whole	Sediment			Frozen	0.25 g 2 g 5 g	1	Not reported	QIAGEN DNeasy / MoBio PowerSoil DNA Isolation Kit QIAGEN DNeasy PowerSoil Pro Kit QIAGEN RNeasy PowerSoil Total RNA Kit + DNA Extraction Kit Favorgen FavorPrep Soil DNA Isolation Midi Kit	Uni18SF + Uni18SR	18S V4	18S	1	Negative	Illumina MiSeq	6318916	4382737	ASV	DADA2	SILVA
Polinski et al., 2019	United States	Subtidal	Not reported	Not reported	van Veen grab	15	Whole	Sediment			Frozen	5 g	Not reported	Not reported	QIAGEN DNeasy / MoBio PowerMax Soil DNA Isolation Kit	SSU_F04 + SSU_R22	18S V1-V2	18S	3	Not reported	Illumina MiSeq	Not reported	2051938	OTU	97% threshold	SILVA PR2
Rossel et al., 2019	Germany	Intertidal	5	37.7 mL	Syringe	5	Whole	Extracted	Sieve + centrifugation with Kaolin and Levasil + Picked by hand	40	Absolute ethanol, freezer	Not reported	Not reported	Not reported	Omega Bio-tek E.Z.N.A. Mollusc DNA kit	SSU_F04 + SSU_R22	18S V1-V2	18S	Not reported	Negative	Illumina MiSeq	N.A. (other projects sequenced in the same run)	± 5600000	OTU	97% threshold	Self-constructed
Rzeznik‐Orignac et al., 2017	France	Subtidal	3	141.4 mL	Corer	10	Whole	Extracted	Sieve + Ludox protocol	40	4 °C	Isolated meiofauna from 141.4 mL sediment	Not reported	Not reported	CTAB method	Euk528 + R18	18S V4-V5	18S	Not reported	Not reported	454 pyrosequencing	191983	144011	OTU	96% threshold	SILVA
Salonen et al., 2019	Finland	Subtidal	2 or more	Not reported	Twin corer	0.5	Whole	Sediment			Frozen	0.25 g	3	Negative	QIAGEN DNeasy / MoBio PowerSoil DNA Isolation Kit	E572F + 897R 1389F+1510R	18S V4 18S V9	18S	2	Negative	Illumina MiSeq	11237993 (18S V4) 6409150 (18S V9)	7708041 (18S V4) 4169688 (18S V9)	OTU	95% threshold	SILVA
Sinniger et al., 2016	Arctic, NW Atlantic, Mediterranean Sea, Pernambuco Abyssal Plain, Brazil Basin, Argentinean Basin, Southern Ocean, Antarctic Peninsula , Andaman Sea, NW Pacific	Deep	For some samples 8, others not reported	Differs upon cruise	Multicorer Box corer Grab samples	3	Whole	Sediment			Frozen	5-10 mL 0.7-1 mL	4	Not reported	QIAGEN DNeasy / MoBio PowerMax Soil DNA Isolation Kit QIAGEN DNeasy / MoBio PowerSoil DNA Isolation Kit	SSU_F04 + SSU_R22mod	18S V1-V2	18S	5	Not reported	454 pyrosequencing	Not reported	530976	OTU	97% threshold	SILVA
Vause et al., 2019	Antarctica	Subtidal	3	20 mL	Corer	Not reported	Whole	Extracted	Sieve	45	Frozen	8-10 g	Not reported	Not reported	QIAGEN DNeasy / MoBio PowerMax Soil DNA Isolation Kit	TAReuk454FWD1 + TAReukREV3 mlCOIintF + jgHCO2198	18S V4 COI	18S COI	3	Negative	Illumina MiSeq	8864734 (COI) 4283138 (18S)	8295561 (COI) 3463925 (18S)	ASV	DADA2	GenBank SILVA
Xie et al., 2018	South Korea	Intertidal	Not reported	785.4 mL	Corer	10	Whole	Sediment			Frozen	0.25 g	Not reported	Not reported	QIAGEN DNeasy / MoBio PowerSoil DNA Isolation Kit	1380F + 1510R mlCOIintF + dgHCO2198	18S V9 COI	18S COI	3	Not reported	Life Technologies ION proton sequencer Ion Torrent PGM sequencer	832856 (18S) 4130740 (COI)	284025 (18S) 1126907 (COI)	OTU	97% threshold	PR2 NCBI nucleotide database
Xie et al., 2017	China	Estuary	5	1 kg	Trowel	10	Whole	Sediment			Frozen	0.25 g	Not reported	Not reported	QIAGEN DNeasy / MoBio PowerSoil DNA Isolation Kit	1380F + 1510R mlCOIintF + dgHCO2198	18S V9 COI	18S COI	3	Not reported	Life Technologies ION proton sequencer Ion Torrent PGM sequencer	Not reported	2179742 (18S) 85622 (COI)	OTU	97% threshold	PR2 Self-constructed
Atherton, S., & Jondelius, U. (2020). Biodiversity between sand grains: Meiofauna composition across southern and western Sweden assessed by metabarcoding. Biodiversity Data Journal, 8. https://doi.org/10.3897/BDJ.8.e51813
Atienza, S., Guardiola, M., Præbel, K., Antich, A., Turon, X., & Wangensteen, O. S. (2020). DNA Metabarcoding of Deep-Sea Sediment Communities Using COI: Community Assessment, Spatio-Temporal Patterns and Comparison with 18S rDNA. Diversity, 12(4), 123. https://doi.org/10.3390/d12040123
Bellisario, B., Fais, M., Duarte, S., Vieira, P., Canchaya, C., and Costa, F. (2021). The spatial network structure of intertidal meiofaunal communities derived from environmental DNA metabarcoding surveys in Northwest Iberia. bioRxiv [Preprint]. doi: https://doi.org/10.1101/2021.03.16.435605.
Bernardino, A. F., Pais, F. S., Oliveira, L. S., Gabriel, F. A., Ferreira, T. O., Queiroz, H. M., & Mazzuco, A. C. A. (2019). Chronic trace metals effects of mine tailings on estuarine assemblages revealed by environmental DNA. PeerJ, 7, e8042. https://doi.org/10.7717/peerj.8042
Bik, H. M., Halanych, K. M., Sharma, J., & Thomas, W. K. (2012a). Dramatic shifts in benthic microbial eukaryote communities following the Deepwater Horizon oil spill. PloS One, 7(6), e38550.
Bik, H. M., Sung, W., Ley, P. D., Baldwin, J. G., Sharma, J., Rocha‐Olivares, A., & Thomas, W. K. (2012b). Metagenetic community analysis of microbial eukaryotes illuminates biogeographic patterns in deep-sea and shallow water sediments. Molecular Ecology, 21(5), 1048–1059. https://doi.org/10.1111/j.1365-294X.2011.05297.x
Brandt, M. I., Pradillon, F., Trouche, B., Henry, N., Liautard-Haag, C., Cambon-Bonavita, M.-A., Cueff-Gauchard, V., Wincker, P., Belser, C., & Poulain, J. (2021a). Evaluating sediment and water sampling methods for the estimation of deep-sea biodiversity using environmental DNA. Scientific Reports, 11(1), 1–14.
Brandt, M. I., Trouche, B., Henry, N., Liautard-Haag, C., Maignien, L., de Vargas, C., Wincker, P., Poulain, J., Zeppilli, D., & Arnaud-Haond, S. (2020a). An Assessment of Environmental Metabarcoding Protocols Aiming at Favoring Contemporary Biodiversity in Inventories of Deep-Sea Communities. Frontiers in Marine Science, 7. https://doi.org/10.3389/fmars.2020.00234
Brandt, M. I., Trouche, B., Quintric, L., Günther, B., Wincker, P., Poulain, J., & Arnaud‐Haond, S. (2021b). Bioinformatic pipelines combining denoising and clustering tools allow for more comprehensive prokaryotic and eukaryotic metabarcoding. Molecular Ecology Resources.
Brannock, P. M., & Halanych, K. M. (2015). Meiofaunal community analysis by high-throughput sequencing: Comparison of extraction, quality filtering, and clustering methods. Marine Genomics, 23, 67–75.
Brannock, P. M., Learman, D. R., Mahon, A. R., Santos, S. R., & Halanych, K. M. (2018). Meiobenthic community composition and biodiversity along a 5500 km transect of Western Antarctica: A metabarcoding analysis. Mar Ecol Prog Ser, 14.
Brannock, P. M., Waits, D. S., Sharma, J., & Halanych, K. M. (2014). High-Throughput Sequencing Characterizes Intertidal Meiofaunal Communities in Northern Gulf of Mexico (Dauphin Island and Mobile Bay, Alabama). The Biological Bulletin, 227(2), 161–174. https://doi.org/10.1086/BBLv227n2p161
Brannock, P. M., Wang, L., Ortmann, A. C., Waits, D. S., & Halanych, K. M. (2016). Genetic assessment of meiobenthic community composition and spatial distribution in coastal sediments along northern Gulf of Mexico. Marine Environmental Research, 119, 166–175.
Broman, E., Raymond, C., Sommer, C., Gunnarsson, J. S., Creer, S., & Nascimento, F. J. (2019). Salinity drives meiofaunal community structure dynamics across the Baltic ecosystem. Molecular Ecology, 28(16), 3813–3829.
Castro, L. R., Meyer, R. S., Shapiro, B., Shirazi, S., Cutler, S., Lagos, A. M., & Quiroga, S. Y. (2021). Metabarcoding meiofauna biodiversity assessment in four beaches of Northern Colombia: Effects of sampling protocols and primer choice. Hydrobiologia. https://doi.org/10.1007/s10750-021-04576-z
Chariton, A. A., Court, L. N., Hartley, D. M., Colloff, M. J., & Hardy, C. M. (2010). Ecological assessment of estuarine sediments by pyrosequencing eukaryotic ribosomal DNA. Frontiers in Ecology and the Environment, 8(5), 233–238.
Chariton, A. A., Ho, K. T., Proestou, D., Bik, H., Simpson, S. L., Portis, L. M., Cantwell, M. G., Baguley, J. G., Burgess, R. M., Pelletier, M. M., Perron, M., Gunsch, C., & Matthews, R. A. (2014). A molecular-based approach for examining responses of eukaryotes in microcosms to contaminant-spiked estuarine sediments. Environmental Toxicology and Chemistry, 33(2), 359–369. https://doi.org/10.100…
Chariton, A. A., Stephenson, S., Morgan, M. J., Steven, A. D. L., Colloff, M. J., Court, L. N., & Hardy, C. M. (2015). Metabarcoding of benthic eukaryote communities predicts the ecological condition of estuaries. Environmental Pollution, 203, 165–174. https://doi.org/10.1016/j.envpol.2015.03.047
Clark, D., Pilditch, C., Pearman, J., Ellis, J., & Zaiko, A. (2020). Environmental DNA metabarcoding reveals estuarine benthic community response to nutrient enrichment–Evidence from an in-situ experiment. Environmental Pollution, 267, 115472.
Cordier, T., Frontalini, F., Cermakova, K., Apothéloz-Perret-Gentil, L., Treglia, M., Scantamburlo, E., Bonamin, V., & Pawlowski, J. (2019). Multi-marker eDNA metabarcoding survey to assess the environmental impact of three offshore gas platforms in the North Adriatic Sea (Italy). Marine Environmental Research, 146, 24–34. https://doi.org/10.1016/j.marenvres.2018.12.009
Cowart, D. A., Pinheiro, M., Mouchel, O., Maguer, M., Grall, J., Miné, J., & Arnaud-Haond, S. (2015). Metabarcoding Is Powerful yet Still Blind: A Comparative Analysis of Morphological and Molecular Surveys of Seagrass Communities. PLoS ONE, 10(2). https://doi.org/10.1371/journal.pone.0117562
Creer, S., Fonseca, V. G., Porazinska, D. L., Giblin‐Davis, R. M., Sung, W., Power, D. M., Packer, M., Carvalho, G. R., Blaxter, M. L., Lambshead, P. J. D., & Thomas, W. K. (2010). Ultrasequencing of the meiofaunal biosphere: Practice, pitfalls and promises. Molecular Ecology, 19(s1), 4–20. https://doi.org/10.1111/j.1365-294X.2009.04473.x
Dafforn, K. A., Baird, D. J., Chariton, A. A., Sun, M. Y., Brown, M. V., Simpson, S. L., Kelaher, B. P., & Johnston, E. L. (2014). Faster, higher and stronger? The pros and cons of molecular faunal data for assessing ecosystem condition. Advances in Ecological Research, 51, 1–40.
Degenhardt, J., Khodami, S., Milke, F., Waska, H., Engelen, B., & Arbizu, P. M. (2021). The three domains of life within the discharge area of a shallow subterranean estuary at a high energy beach. Frontiers in Environmental Science.
DiBattista, J. D., Reimer, J. D., Stat, M., Masucci, G. D., Biondi, P., De Brauwer, M., & Bunce, M. (2019). Digging for DNA at depth: Rapid universal metabarcoding surveys (RUMS) as a tool to detect coral reef biodiversity across a depth gradient. PeerJ, 7, e6379.
Fais, M., Bellisario, B., Duarte, S., Vieira, P. E., Sousa, R., Canchaya, C., & Costa, F. O. (2020a). Meiofauna metabarcoding in Lima estuary (Portugal) suggests high taxon replacement within a background of network stability. Regional Studies in Marine Science, 38, 101341.
Fais, M., Duarte, S., Vieira, P. E., Sousa, R., Hajibabaei, M., Canchaya, C. A., & Costa, F. O. (2020b). Small-scale spatial variation of meiofaunal communities in Lima estuary (NW Portugal) assessed through metabarcoding. Estuarine, Coastal and Shelf Science, 238, 106683. https://doi.org/10.1016/j.ecss.2020.106683
Faria, L. C. de, Di Domenico, M., Andrade, S. C. S., Santos, M. C. dos, Fonseca, G., Zanol, J., & Amaral, A. C. Z. (2018). The use of metabarcoding for meiofauna ecological patterns assessment. Marine Environmental Research, 140, 160–168. https://doi.org/10.1016/j.marenvres.2018.06.013
Fegley, S. R., Smith, J. P., Johnson, D., Schirmer, A., Jones‐Boggs, J., Edmonds, A., & Bursey, J. (2020). Nourished, Exposed Beaches Exhibit Altered Sediment Structure and Meiofaunal Communities. Diversity, 12(6), 245.
Fonseca, V. G., Carvalho, G. R., Nichols, B., Quince, C., Johnson, H. F., Neill, S. P., Lambshead, J. D., Thomas, W. K., Power, D. M., & Creer, S. (2014). Metagenetic analysis of patterns of distribution and diversity of marine meiobenthic eukaryotes. Global Ecology and Biogeography, 23(11), 1293–1302. https://doi.org/10.1111/geb.12223
Fonseca, V. G., Carvalho, G. R., Sung, W., Johnson, H. F., Power, D. M., Neill, S. P., Packer, M., Blaxter, M. L., Lambshead, P. J. D., Thomas, W. K., & Creer, S. (2010). Second-generation environmental sequencing unmasks marine metazoan biodiversity. Nature Communications, 1(1), 1–8.
Fonseca, V. G., Sinniger, F., Gaspar, J., Quince, C., Creer, S., Power, D. M., Peck, L. S., & Clark, M. S. (2017). Revealing higher than expected meiofaunal diversity in Antarctic sediments: A metabarcoding approach. Scientific Reports, 7(1), 1–11.
Guardiola, M., Uriz, M. J., Taberlet, P., Coissac, E., Wangensteen, O. S., & Turon, X. (2015). Deep-sea, deep-sequencing: Metabarcoding extracellular DNA from sediments of marine canyons. PloS One, 10(10), e0139633.
Guardiola, M., Wangensteen, O. S., Taberlet, P., Coissac, E., Uriz, M. J., & Turon, X. (2016). Spatio-temporal monitoring of deep-sea communities using metabarcoding of sediment DNA and RNA. PeerJ, 4, e2807. https://doi.org/10.7717/peerj.2807
Haenel, Q., Holovachov, O., Jondelius, U., Sundberg, P., & Bourlat, S. J. (2017). NGS-based biodiversity and community structure analysis of meiofaunal eukaryotes in shell sand from Hållö island, Smögen, and soft mud from Gullmarn Fjord, Sweden. Biodiversity Data Journal, 5. https://doi.org/10.3897/BDJ.5.e12731
He, X., Gilmore, S. R., Sutherland, T. F., Hajibabaei, M., Miller, K. M., Westfall, K. M., Pawlowski, J., & Abbott, C. L. (2021). Biotic signals associated with benthic impacts of salmon farms from eDNA metabarcoding of sediments. Molecular Ecology, n/a(n/a). https://doi.org/10.1111/mec.15814
He, X., Sutherland, T. F., & Abbott, C. L. (2020). Improved efficiency in eDNA metabarcoding of benthic metazoans by sieving sediments prior to DNA extraction. Environmental DNA, n/a(n/a). https://doi.org/10.1002/edn3.172
Holman, L. E., de Bruyn, M., Creer, S., Carvalho, G., Robidart, J., & Rius, M. (2019). Detection of introduced and resident marine species using environmental DNA metabarcoding of sediment and water. Scientific Reports, 9(1), 1–10.
Kim, H., Kim, H., Hwang, H. S., & Kim, W. (2017). Metagenomic analysis of the marine coastal invertebrates of South Korea as assessed by Ilumina MiSeq. Animal Cells and Systems, 21(1), 37–44. https://doi.org/10.1080/19768354.2016.1271012
Kitahashi, T., Sugime, S., Inomata, K., Nishijima, M., Kato, S., & Yamamoto, H. (2020). Meiofaunal diversity at a seamount in the pacific ocean: A comprehensive study using environmental DNA and RNA. Deep Sea Research Part I: Oceanographic Research Papers, 160, 103253. https://doi.org/10.1016/j.dsr.2020.103253
Klunder, L., De Stigter, H., Lavaleye, M. S., Van Bleijswijk, J. D., Van Der Veer, H. W., Reichart, G.-J., & Duineveld, G. C. (2020a). A molecular approach to explore the background benthic fauna around a hydrothermal vent and their larvae: Implications for future mining of deep-sea SMS deposits. Frontiers in Marine Science.
Klunder, L., Duineveld, G. C., Lavaleye, M. S., van der Veer, H. W., Palsbøll, P. J., & van Bleijswijk, J. D. (2019). Diversity of Wadden Sea macrofauna and meiofauna communities highest in DNA from extractions preceded by cell lysis. Journal of Sea Research, 152, 101764.
Klunder, L., Lavaleye, M. S. S., Filippidi, A., van Bleijswijk, J. D. L., Reichart, G.-J., van der Veer, H. W., Duineveld, G. C. A., & Mienis, F. (2020b). Impact of an artificial structure on the benthic community composition in the southern North Sea: Assessed by a morphological and molecular approach. ICES Journal of Marine Science, 77(3), 1167–1177. https://doi.org/10.1093/icesjms/fsy114
Lallias, D., Hiddink, J. G., Fonseca, V. G., Gaspar, J. M., Sung, W., Neill, S. P., Barnes, N., Ferrero, T., Hall, N., Lambshead, P. J. D., Packer, M., Thomas, W. K., & Creer, S. (2015). Environmental metabarcoding reveals heterogeneous drivers of microbial eukaryote diversity in contrasting estuarine ecosystems. The ISME Journal, 9(5), 1208–1221. https://doi.org/10.1038/ismej.2014.213
Lanzén, A., Lekang, K., Jonassen, I., Thompson, E. M., & Troedsson, C. (2016). High‐throughput metabarcoding of eukaryotic diversity for environmental monitoring of offshore oil‐drilling activities. Molecular Ecology, 25(17), 4392–4406.
Lanzén, A., Lekang, K., Jonassen, I., Thompson, E. M., & Troedsson, C. (2017). DNA extraction replicates improve diversity and compositional dissimilarity in metabarcoding of eukaryotes in marine sediments. PLOS ONE, 12(6), e0179443. https://doi.org/10.1371/journal.pone.0179443
Laroche, O., Kersten, O., Smith, C. R., & Goetze, E. (2020). Environmental DNA surveys detect distinct metazoan communities across abyssal plains and seamounts in the western Clarion Clipperton Zone. Molecular Ecology, 29(23), 4588–4604. https://doi.org/10.1111/mec.15484
Leasi, F., Sevigny, J. L., & Hassett, B. T. (2021). Meiofauna as a valuable bioindicator of climate change in the polar regions. Ecological Indicators, 121, 107133. https://doi.org/10.1016/j.ecolind.2020.107133
Leasi, F., Sevigny, J. L., Laflamme, E. M., Artois, T., Curini-Galletti, M., de Jesus Navarrete, A., Di Domenico, M., Goetz, F., Hall, J. A., Hochberg, R., Jörger, K. M., Jondelius, U., Todaro, M. A., Wirshing, H. H., Norenburg, J. L., & Thomas, W. K. (2018). Biodiversity estimates and ecological interpretations of meiofaunal communities are biased by the taxonomic approach. Communications Biolog…
Lejzerowicz, F., Esling, P., Pillet, L., Wilding, T. A., Black, K. D., & Pawlowski, J. (2015). High-throughput sequencing and morphology perform equally well for benthic monitoring of marine ecosystems. Scientific Reports, 5(1), 13932. https://doi.org/10.1038/srep13932
López-Escardó, D., Paps, J., de Vargas, C., Massana, R., Ruiz-Trillo, I., & Del Campo, J. (2018). Metabarcoding analysis on European coastal samples reveals new molecular metazoan diversity. Scientific Reports, 8(1), 1–14.
Martínez, A., Eckert, E. M., Artois, T., Careddu, G., Casu, M., Curini-Galletti, M., Gazale, V., Gobert, S., Ivanenko, V. N., Jondelius, U., Marzano, M., Pesole, G., Zanello, A., Todaro, M. A., & Fontaneto, D. (2020). Human access impacts biodiversity of microscopic animals in sandy beaches. Communications Biology, 3(1), 1–9. https://doi.org/10.1038/s42003-020-0912-6
Mauffrey, F., Cordier, T., Apothéloz‐Perret‐Gentil, L., Cermakova, K., Merzi, T., Delefosse, M., Blanc, P., & Pawlowski, J. (2020). Benthic monitoring of oil and gas offshore platforms in the North Sea using environmental DNA metabarcoding. Molecular Ecology.
Nascimento, F.J.A., Dahl, M., Deyanova, D., Lyimo, L.D., Bik, H.M., Schuelke, T., et al. (2019). Above-below surface interactions mediate effects of seagrass disturbance on meiobenthic diversity, nematode and polychaete trophic structure. Communications Biology 2(1), 362. doi: 10.1038/s42003-019-0610-4.
Nascimento, F. J. A., Lallias, D., Bik, H. M., & Creer, S. (2018). Sample size effects on the assessment of eukaryotic diversity and community structure in aquatic sediments using high-throughput sequencing. Scientific Reports, 8(1), 11737. https://doi.org/10.1038/s41598-018-30179-1
Pansu, J., Chapman, M. B., Hose, G. C., Chariton, A. A., Pansu, J., Chapman, M. B., Hose, G. C., & Chariton, A. A. (2021). Comparison of an extracellular v. Total DNA extraction approach for environmental DNA-based monitoring of sediment biota. Marine and Freshwater Research. https://doi.org/10.1071/MF20269
Pawlowski, J., Christen, R., Lecroq, B., Bachar, D., Shahbazkia, H. R., Amaral-Zettler, L., & Guillou, L. (2011). Eukaryotic Richness in the Abyss: Insights from Pyrotag Sequencing. PLOS ONE, 6(4), e18169. https://doi.org/10.1371/journal.pone.0018169
Pearman, J. K., Irigoien, X., & Carvalho, S. (2016). Extracellular DNA amplicon sequencing reveals high levels of benthic eukaryotic diversity in the central Red Sea. Marine Genomics, 26, 29–39.
Pearman, J. K., Keeley, N. B., Wood, S. A., Laroche, O., Zaiko, A., Thomson-Laing, G., Biessy, L., Atalah, J., & Pochon, X. (2020). Comparing sediment DNA extraction methods for assessing organic enrichment associated with marine aquaculture. PeerJ, 8, e10231. https://doi.org/10.7717/peerj.10231
Polinski, J. M., Bucci, J. P., Gasser, M., & Bodnar, A. G. (2019). Metabarcoding assessment of prokaryotic and eukaryotic taxa in sediments from Stellwagen Bank National Marine Sanctuary. Scientific Reports, 9(1), 1–8.
Rossel, S., Khodami, S., & Martínez Arbizu, P. (2019). Comparison of rapid biodiversity assessment of meiobenthos using MALDI-TOF MS and metabarcoding. Frontiers in Marine Science, 6, 659.
Rzeznik-Orignac, J., Kalenitchenko, D., Mariette, J., Bodiou, J.-Y., Le Bris, N., & Derelle, E. (2017). Comparison of meiofaunal diversity by combined morphological and molecular approaches in a shallow Mediterranean sediment. Marine Biology, 164(3), 40. https://doi.org/10.1007/s00227-017-3074-4
Salonen, I., Chronopoulou, P., Leskinen, E., & Koho, K. (2019). Metabarcoding successfully tracks temporal changes in eukaryotic communities in coastal sediments. FEMS Microbiology Ecology, 95(1), fiy226.
Sinniger, F., Pawlowski, J., Harii, S., Gooday, A. J., Yamamoto, H., Chevaldonné, P., Cedhagen, T., Carvalho, G., & Creer, S. (2016). Worldwide Analysis of Sedimentary DNA Reveals Major Gaps in Taxonomic Knowledge of Deep-Sea Benthos. Frontiers in Marine Science, 3. https://doi.org/10.3389/fmars.2016.00092
Vause, B. J., Morley, S. A., Fonseca, V. G., Jażdżewska, A., Ashton, G. V., Barnes, D. K., Giebner, H., Clark, M. S., & Peck, L. S. (2019). Spatial and temporal dynamics of Antarctic shallow soft-bottom benthic communities: Ecological drivers under climate change. BMC Ecology, 19(1), 1–14.
Xie, Y., Hong, S., Kim, S., Zhang, X., Yang, J., Giesy, J. P., Wang, T., Lu, Y., Yu, H., & Khim, J. S. (2017). Ecogenomic responses of benthic communities under multiple stressors along the marine and adjacent riverine areas of northern Bohai Sea, China. Chemosphere, 172, 166–174. https://doi.org/10.1016/j.chemosphere.2016.12.121
Xie, Y., Zhang, X., Yang, J., Kim, S., Hong, S., Giesy, J. P., Yim, U. H., Shim, W. J., Yu, H., & Khim, J. S. (2018). EDNA-based bioassessment of coastal sediments impacted by an oil spill. Environmental Pollution, 238, 739–748.
